# Supplementary material for: Effectiveness and Safety of Exercise Therapy for Non-Dialysis-Dependent Chronic Kidney Disease: A Systematic Review and Meta-Analysis
Source: Research Square preprint supplement (doi:10.21203/rs.3.rs-8429148/v1), 2026-01-12
Supplement: Supplementary file 1 [file cfad1320b4fedc79febf8f7e.docx]

**Effectiveness and Safety of Exercise Therapy for Non-Dialysis-Dependent Chronic Kidney Disease: A Systematic Review and Meta-Analysis**

Shuhei Nakajima1, Toshiaki Usui1, Akihisa Hattori, Shun Ishibashi, Takuya Harada, Tadashi Sofue, Naohiko Fujii, Masakazu Saitoh, Ichiei Narita, Kunihiro Yamagata1 Junichi Hoshino, Susumu Toda9*.

1. Department of Nephrology, Faculty of Medicine, University of Tsukuba, Tsukuba, Ibaraki, Japan. 9. Department of Nephrology, Kameoka Hospital, Kameoka, Kyoto, Japan. * Corresponding author

**Supplemental** **Figure 3 – 1 ~ 25: Funnel Plot**

**Supplemental Figure 3 - 1 ~ 2. F**unnel plot of kidney function

**SF3 – 1**: Estimated glomerular filtration rate (mL/min/1.73m2); **SF3 – 2:** proteinuria

| 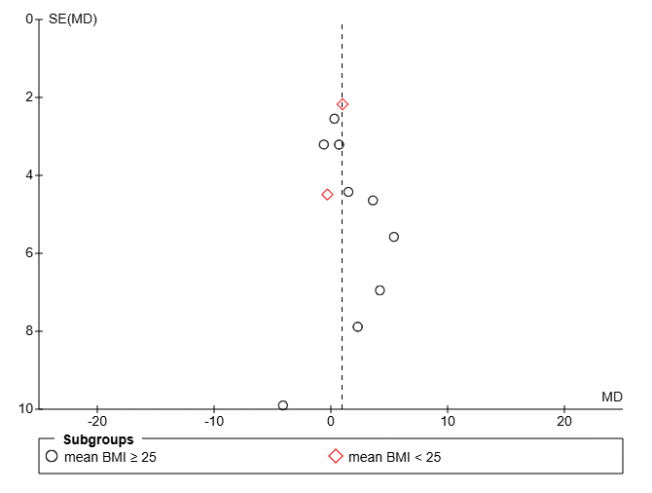**SF3 – 1:** Estimated glomerular filtration rate (mL/min/1.73m2) | 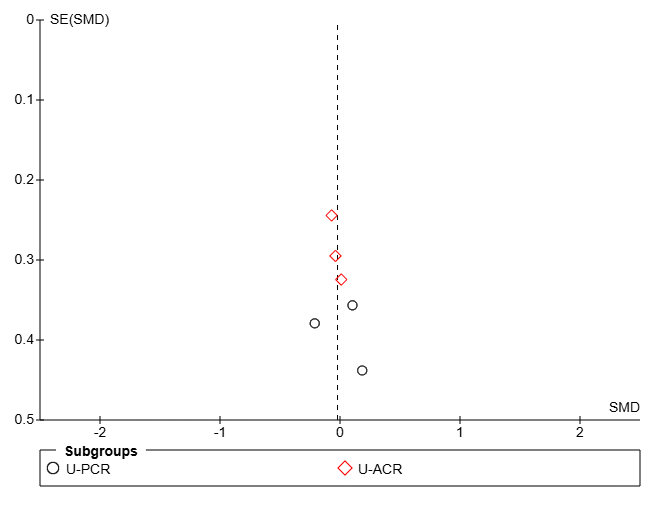**SF3 – 2:** proteinuria |
| --- | --- |

**Supplemental Figure 3 – 3 ~ 6** Funnel plot of physical function

**SF3 – 3**: peak VO2 (mL/kg/min); **SF3 – 4:** Six-minute walk distance test (m); **SF3 – 5**: Hand grip strength (kg); **SF3 – 6**: Sit to stand test

| **SF3 – 3:** peak VO2 (mL/kg/min)  **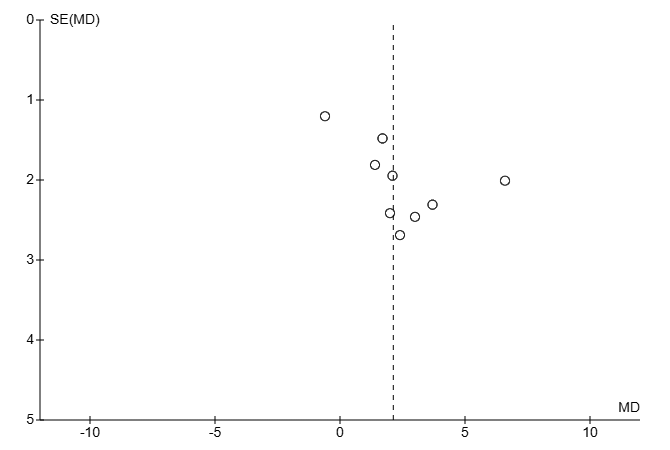** | **SF3 – 4:** 6MWT (m)  **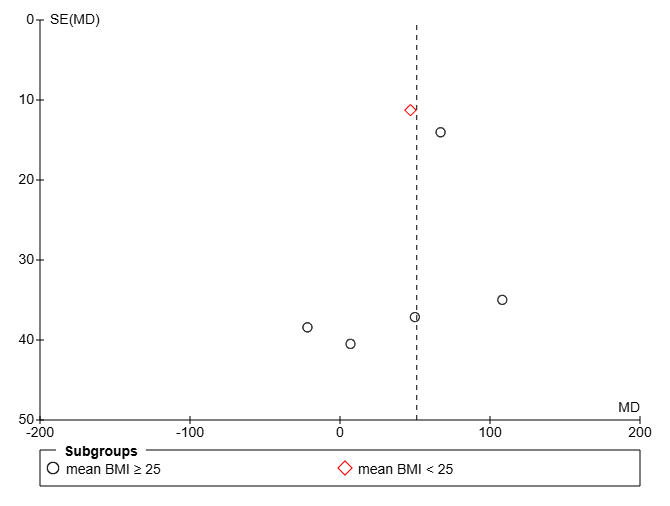** |
| --- | --- |
| **SF3 – 5**: Handgrip strength (kg)**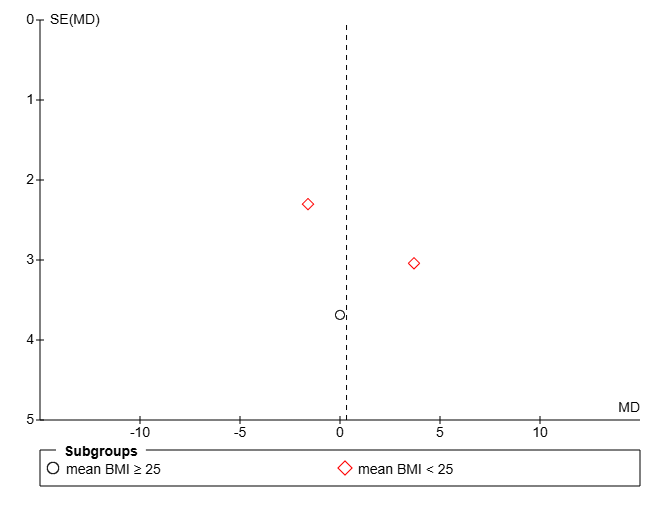** | **SF3 – 6**: Sit to stand test  **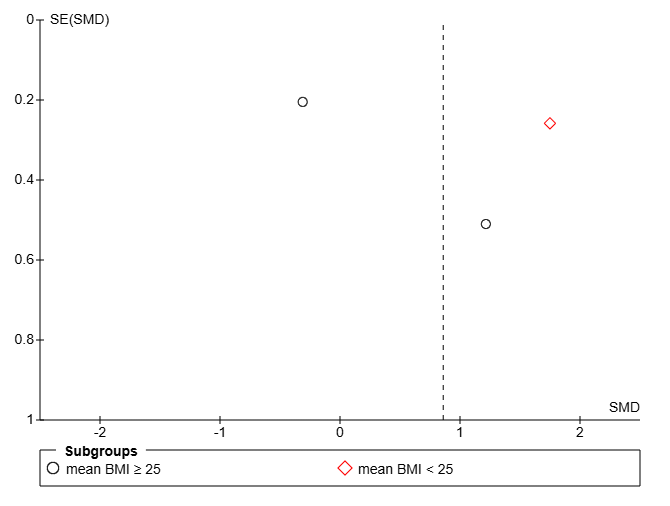** |

**Supplemental Figure 3 – 7 ~ 19** Health-RelatedQuality of Life

**SF3 – 7:** Burden of kidney disease; **SF3 – 8:** Effect of kidney disease; **SF3 – 9:** Symptoms/Problems; **SF3 – 10:** Physical Component Summary; **SF3 – 11:** Mental Component Summary; **SF3 – 12:** Physical function; **SF3 – 13:** General health; **SF3 – 14:** Role emotional; **SF3 – 15:** Role physical; **SF3 – 16:** Vitality; **SF3 – 17:** Mental health; **SF3 – 18:** Bodily pain; **SF3 – 19:** Social functioning.

| **SF3 – 7:** Burden of kidney disease **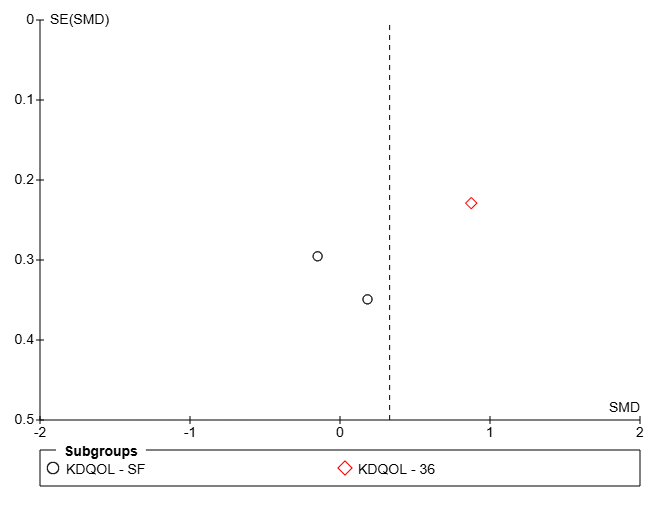** | **SF3 – 8:** Effect of kidney disease **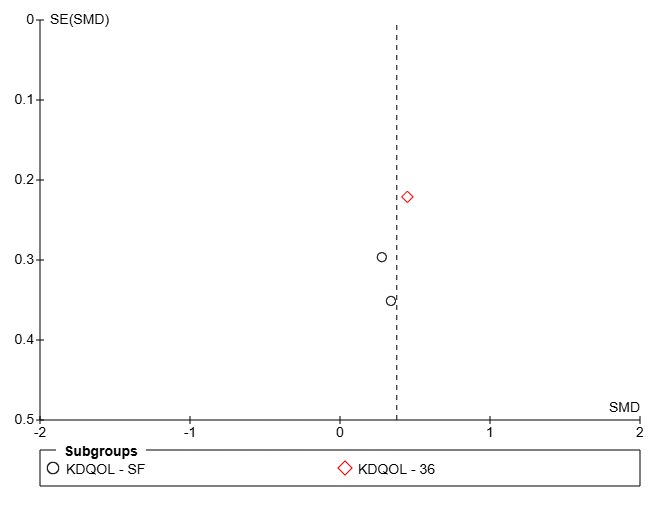** |
| --- | --- |
| **SF3 – 9:** Symptoms/Problems **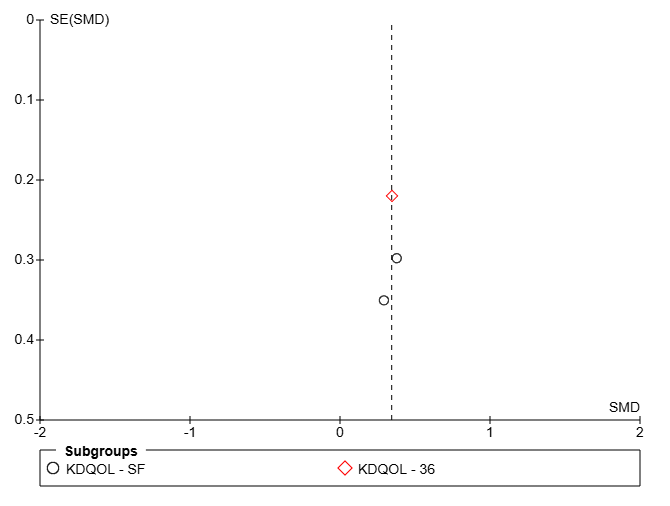** | **SF3 – 10:** Physical Component Summary **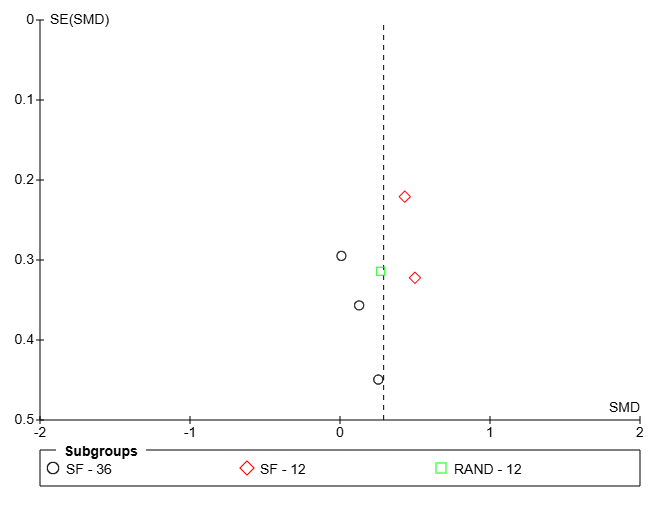** |
| **SF3 – 11:** Mental Component Summary **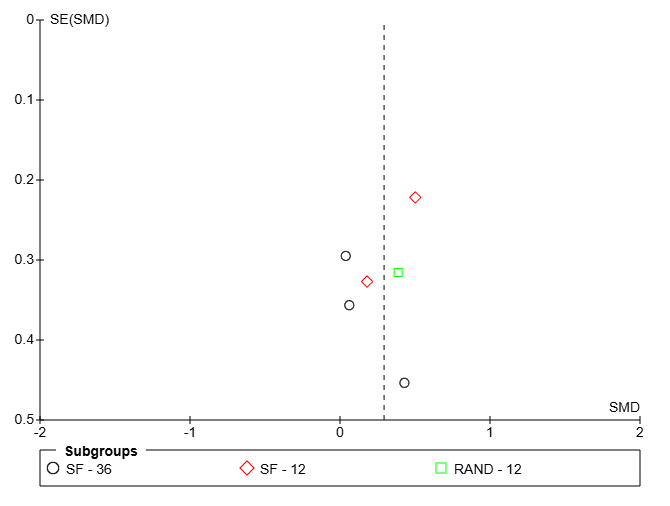** | **SF3 – 12:** Physical function **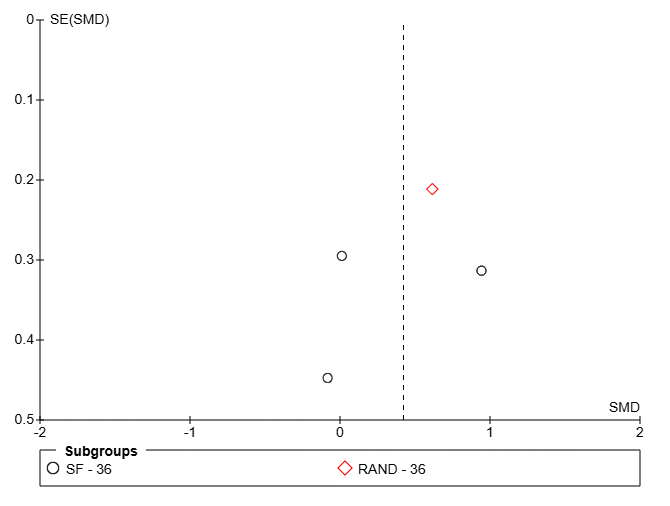** |
| **SF3 – 13:** General health **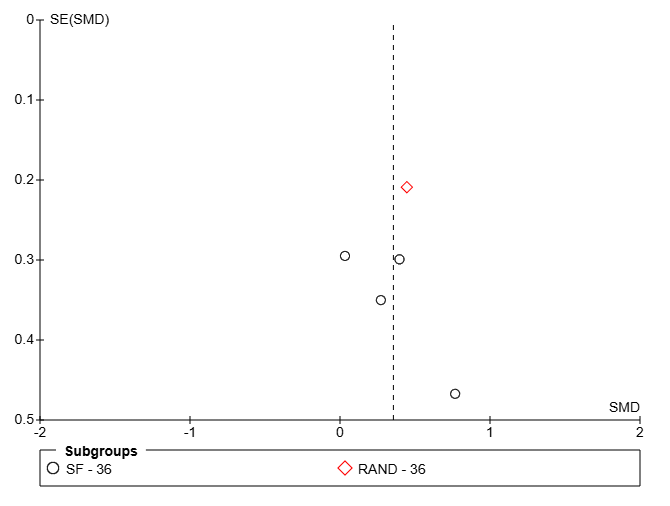** | **SF3 – 14:** Role emotional **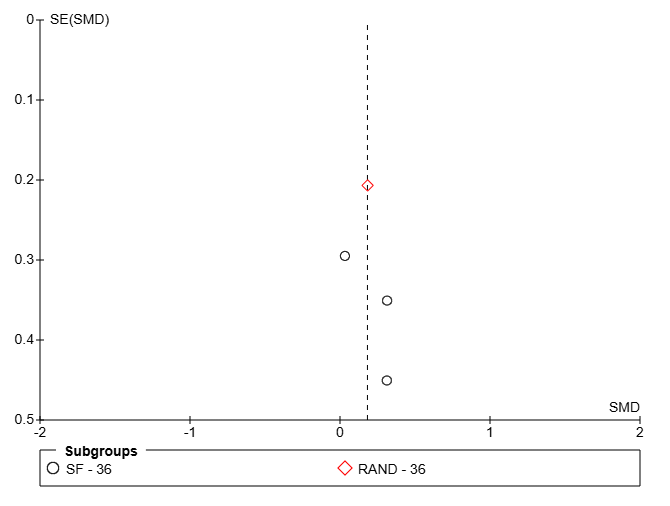** |
| **SF3 – 15:** Role physical **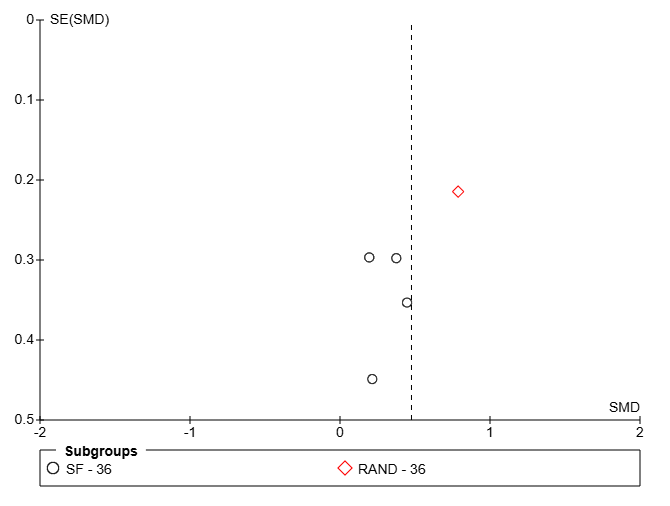** | **SF3 – 16:** Vitality **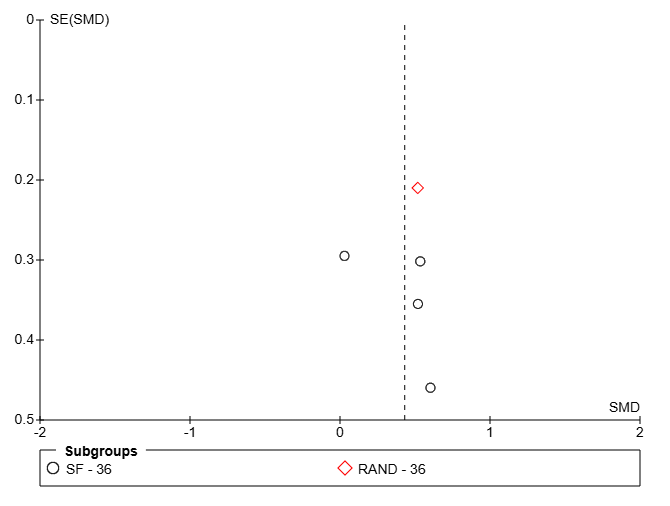** |
| **SF3 – 17:** Mental health **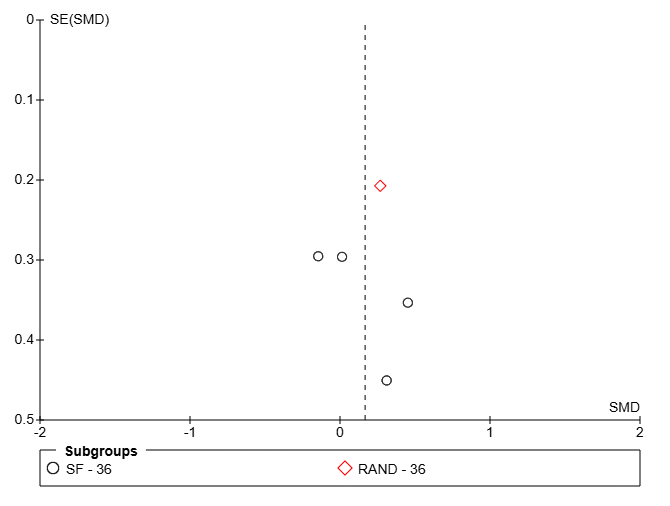** | **SF3 – 18:** Bodily pain **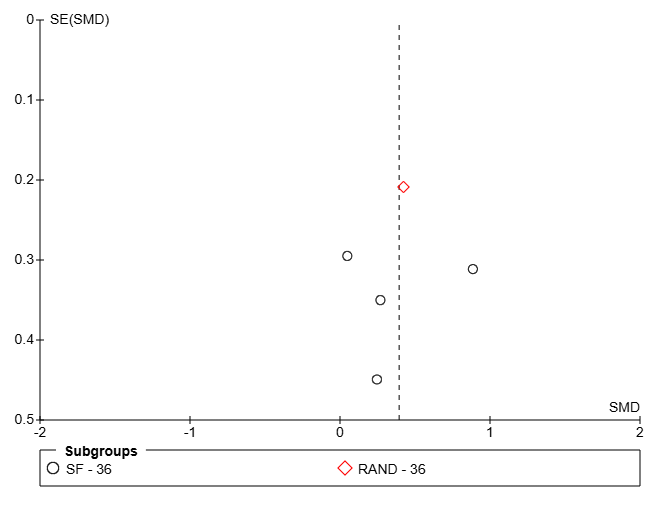** |
| **SF3 – 19:** Social functioning **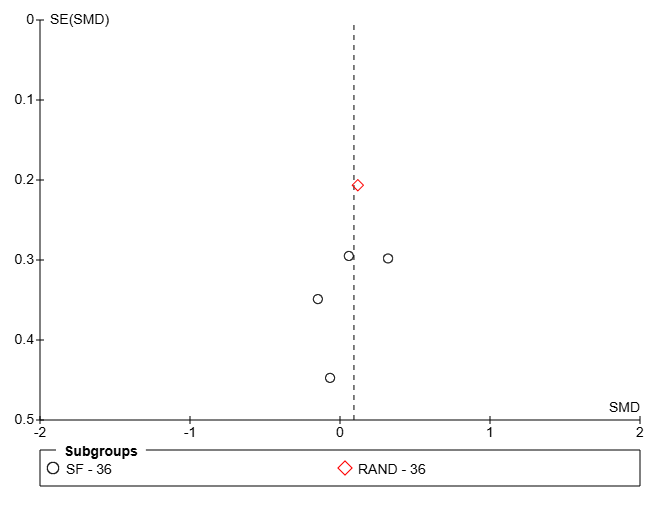** |  |

**Supplemental Figure 3 – 20 ~ 25** Funnel plot of metabolic profiles

**SF3 – 20**: body mass index (kg/m2); **SF3 – 21:** total cholesterol (mg/dL); **SF3 – 22:** low density lipoprotein cholesterol (mg/dL); **SF3 – 23:** high density lipoprotein cholesterol (mg/dL); **SF3 – 24:** triglyceride (mg/dL); **SF3 – 25:** hemoglobin A1c (%).

| **SF3 – 20**: body mass index (kg/m2)**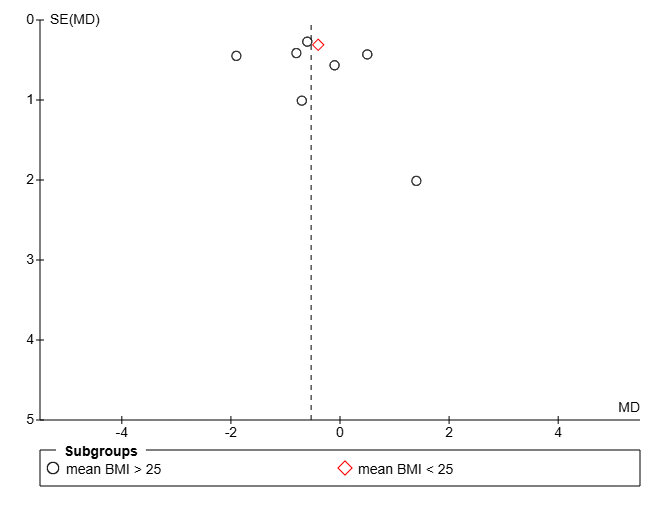** | **SF3 – 21:** total cholesterol (mg/dL)**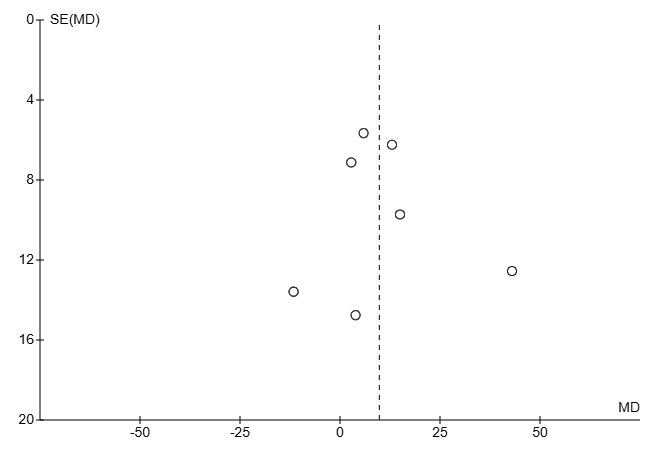** |
| --- | --- |
| **SF3 – 22:** low density lipoprotein cholesterol (mg/dL)**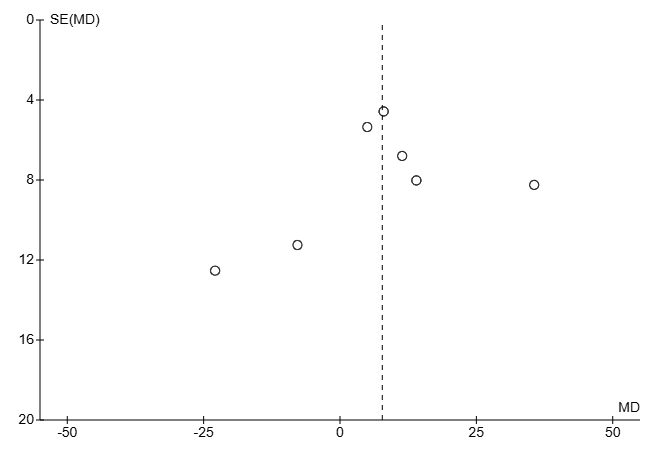** | **SF3 – 23:** high density lipoprotein cholesterol  **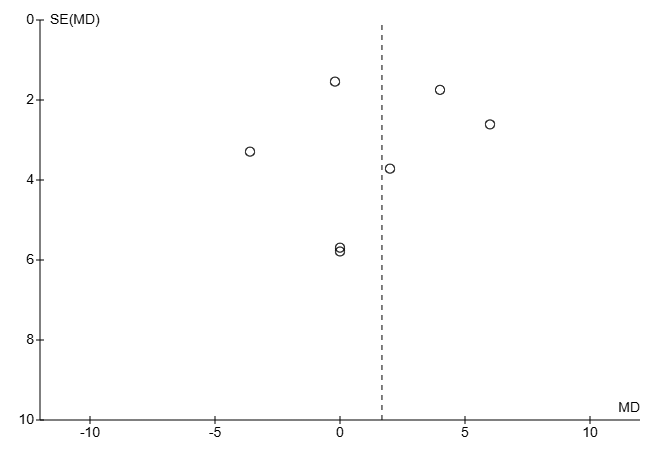** |
| **SF3 – 24:** triglyceride (mg/dL)**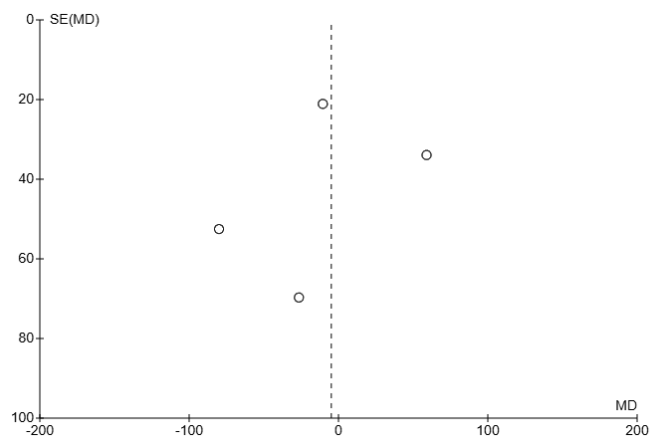** | **SF3 – 25:** hemoglobin A1c (%)**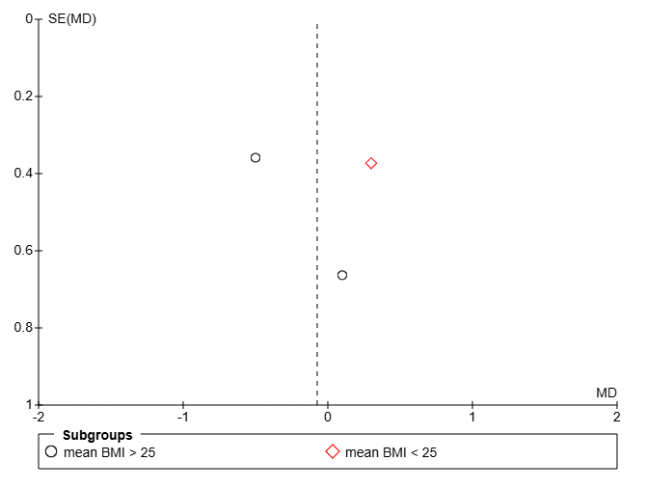** |
